# Supplementary material
Source: PubMed Central journal article supplement (PMC2950425)

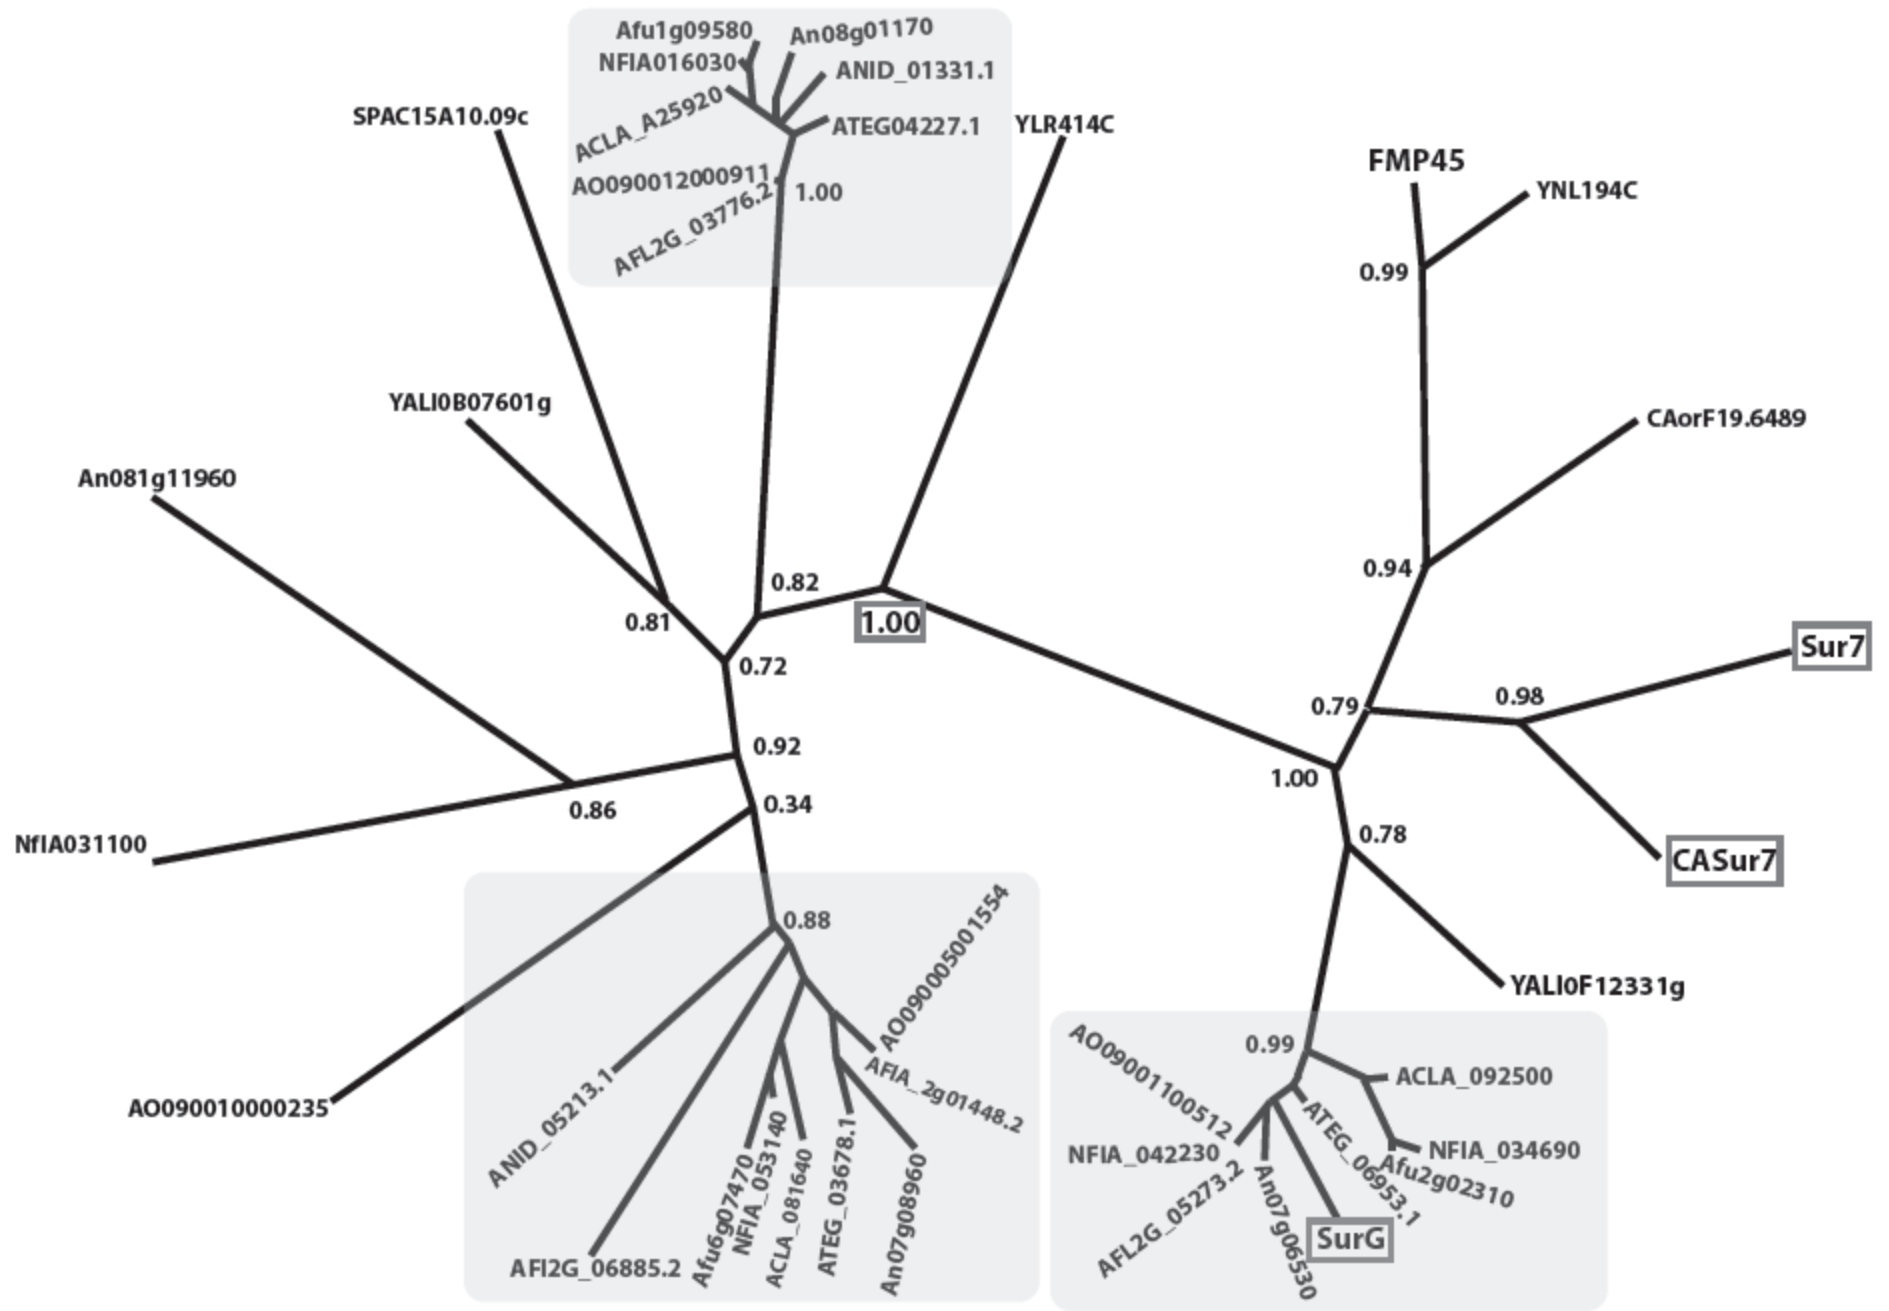

Supplementary Figure 1

Supplement: supp_9_10_1441__1.pdf [file supp_9_10_1441__1.pdf]

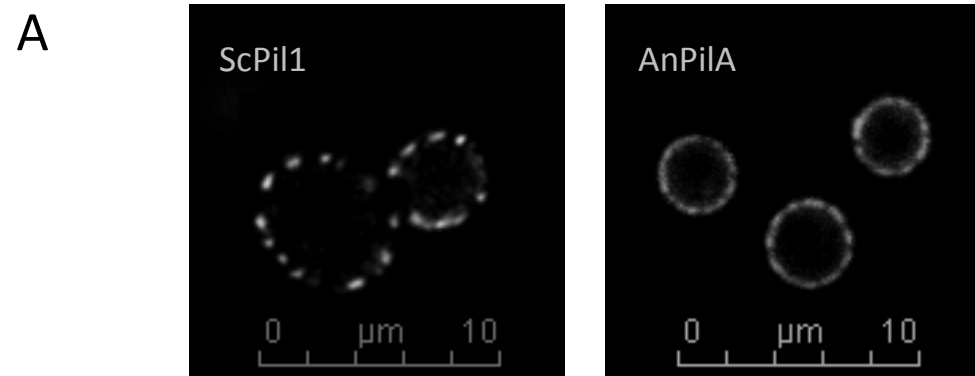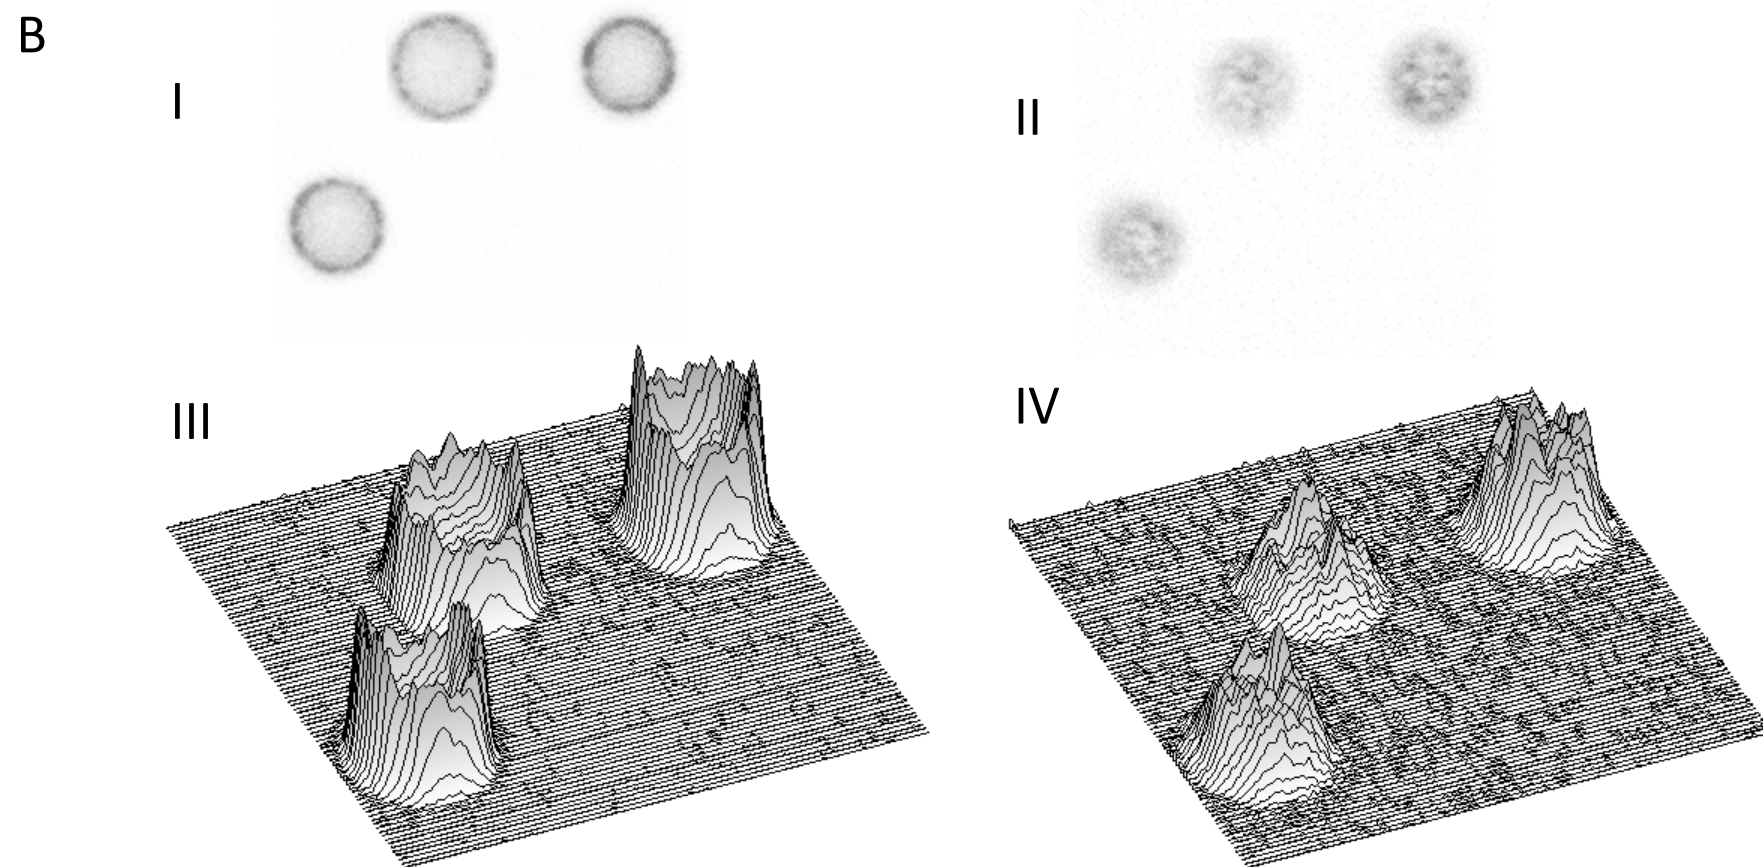

Supplement: supp_9_10_1441__2.pdf [file supp_9_10_1441__2.pdf]
